# Supplementary material
Source: HighWire-hosted journal article supplement (https://erj.ersjournals.com/content/58/5/2101920)

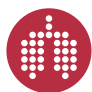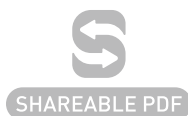

# Predictors of severe COVID-19 in a registry-based Swedish cohort of patients with COPD

Caroline Stridsman <sup>1</sup>, Lowie E.G.W. Vanfleteren <sup>2,3</sup>, Jon R. Konradsen <sup>4</sup>, Sten Axelsson Fisk<sup>5</sup>, Christophe Pedroletti<sup>6</sup>, Yvonne Sjö<sup>7</sup>, Jörgen Syk<sup>6,8,9</sup>, Therese Sterner<sup>10</sup>, Anne Lindberg <sup>1</sup>, Alf Tunsäter<sup>11</sup>, Fredrik Nyberg<sup>12</sup>, Ann Ekberg-Jansson<sup>3</sup> and Johanna Karlsson Sundbaum<sup>13</sup>

<sup>1</sup>Dept of Public Health and Clinical Medicine, Division of Medicine/The OLIN-unit, Umeå University, Umeå, Sweden. <sup>2</sup>COPD Center, Dept of Respiratory Medicine and Allergology, Sahlgrenska University Hospital, Gothenburg, Sweden. <sup>3</sup>Dept of Internal Medicine and Clinical Nutrition, Institute of Medicine, Sahlgrenska Academy, University of Gothenburg, Gothenburg, Sweden. <sup>4</sup>Dept of Women's and Children's Health, Karolinska Institutet, Stockholm, Sweden. <sup>5</sup>Dept of Clinical Sciences Lund, Obstetrics and Gynaecology, Lund University and Ystad Hospital, Lund, Sweden. <sup>6</sup>Dept of Women's and Children's Health, Uppsala University, Uppsala, Sweden. <sup>7</sup>The Swedish National Airway Register, Gothenburg, Sweden. <sup>8</sup>Academic Primary Health Care Centre, Stockholm, Sweden. <sup>9</sup>Dept of Neurobiology, Care Sciences and Society, Karolinska Institutet, Stockholm, Sweden. <sup>10</sup>Dept of Occupational and Environmental Dermatology, Skåne University Hospital, Lund University, Malmö, Sweden. <sup>11</sup>Dept of Respiratory Medicine and Allergology, Skåne University Hospital, Lund University, Lund, Sweden. <sup>12</sup>School of Public Health and Community Medicine, Institute of Medicine, Sahlgrenska Academy, University of Gothenburg, Gothenburg, Sweden. <sup>13</sup>Dept of Health, Education and Technology, Luleå University of Technology, Luleå, Sweden.

Corresponding author: Caroline Stridsman ([Caroline.stridsman@norbotten.se](mailto:Caroline.stridsman@norbotten.se))

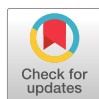

Shareable abstract (@ERSpublications)

Older age, male sex, low educational level, symptom burden, degree of obstruction, underweight, obesity, comorbidity and prior COPD inpatient or secondary care predict severe COVID-19 in patients with COPD <https://bit.ly/2VHZIEm>

**Cite this article as:** Stridsman C, Vanfleteren LEGW, Konradsen JR, *et al.* Predictors of severe COVID-19 in a registry-based Swedish cohort of patients with COPD. *Eur Respir J* 2021; 58: 2101920 [DOI: 10.1183/13993003.01920-2021].

This single-page version can be shared freely online.

Copyright ©The authors 2021.

This version is distributed under the terms of the Creative Commons Attribution Non-Commercial Licence 4.0. For commercial reproduction rights and permissions contact [permissions@ersnet.org](mailto:permissions@ersnet.org)

Received: 01 June 2021  
Accepted: 04 Aug 2021

*To the Editor:*

It is unclear if patients with COPD are at increased risk of becoming infected with severe acute respiratory syndrome coronavirus 2 (SARS-CoV-2) [1, 2]. However, after contracting SARS-CoV-2, patients with COPD are at high risk of severe coronavirus disease 2019 (COVID-19), a condition associated with morbidity and mortality [3, 4]. Although studies have described COVID-19 cohorts and investigated COPD as a risk factor, studies investigating patients with COPD in relation to risks of COVID-19 remain rare. Approved by the Swedish Ethical Review Authority (2020-02777), the current study was based on the Swedish National Airway Register (SNAR), which includes a large, well-characterised cohort of patients with COPD [5]. In the cohort, patients who have been hospitalised or died from COVID-19 were identified, which afforded a unique opportunity to study predictors of severe COVID-19 in COPD.

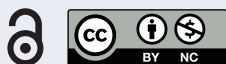

Supplement: inline-supplementary-material-1 [file inline-supplementary-material-1.pdf]
